# Supplementary material for: Characterization and Application of the Sugar Transporter Zmo0293 from Zymomonas mobilis
Source: MDPI journal article supplement (doi:10.3390/ijms24065888), 2023-03-20
Supplement: s1 [file s1]

**Supplementary information for**

**Characterization and application of the sugar transporter Zmo0293**

**from *Zymomonas mobilis***

Kun Zhang, Wenwen Zhang, Mengxing Qin, Yi Li, Hailei Wang\*

Henan Province Engineering Laboratory for Bioconversion Technology of Functional  
Microbes, College of Life Sciences, Henan Normal University, Xinxiang 453007, Henan,  
China

\* Correspondence: whl@htu.cn (H. Wang)

## Supplementary Figure S1. Comparison of structure prediction of Zmo0293 and Glf.

Structure prediction was performed using AlphaFold. A. The predicted transmembrane region of Zmo0293; B. The predicted 3D structure of Zmo0293; C. The predicted transmembrane region of Glf; D. The predicted 3D structure of Glf.

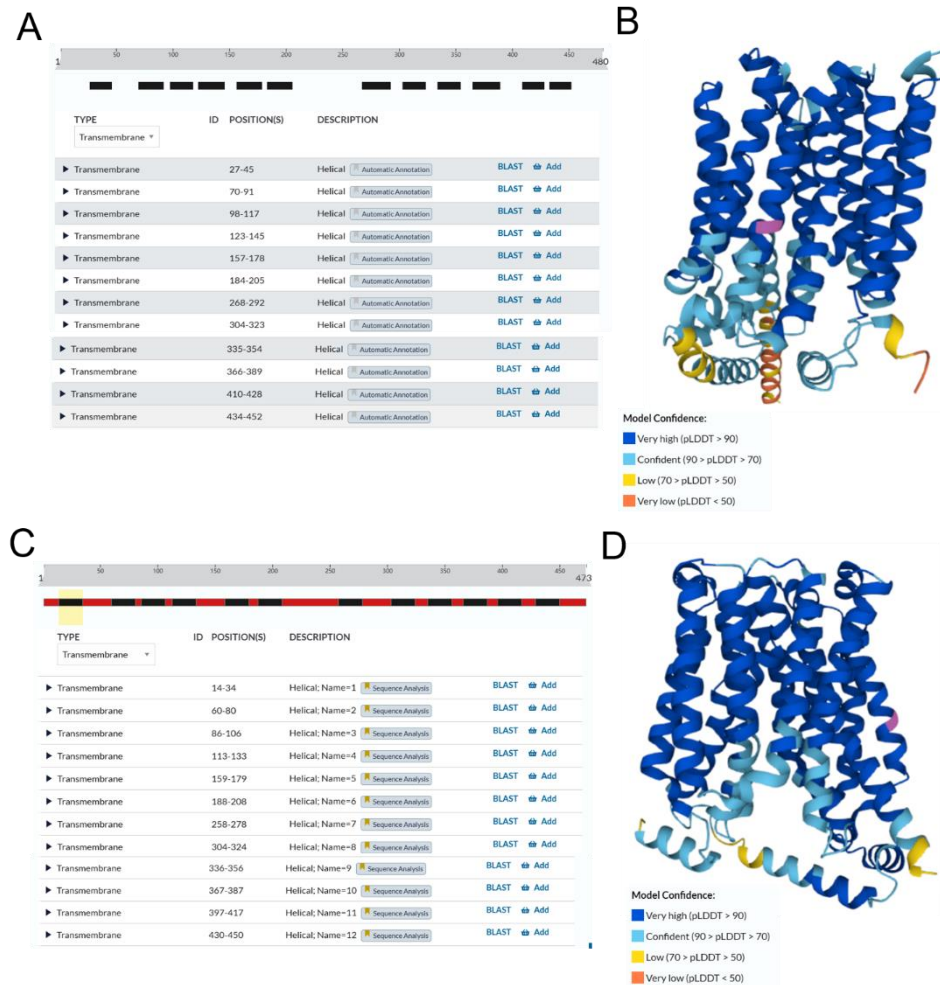

AlphaFold website: <https://www.alphafold.ebi.ac.uk/>

Supplementary Figure S2. PCR verification of deletion of *ZMO0293* gene in ZM4.

Lanes 1 and 2 represent wild -type ZM4; Lanes 3 and 4 represent ZM4- $\Delta$ *ZMO0293* mutant;

Lanes 5 and 6 represent *ZMO0293* fragment in ZM4- $\Delta$ *ZMO0293* mutant.

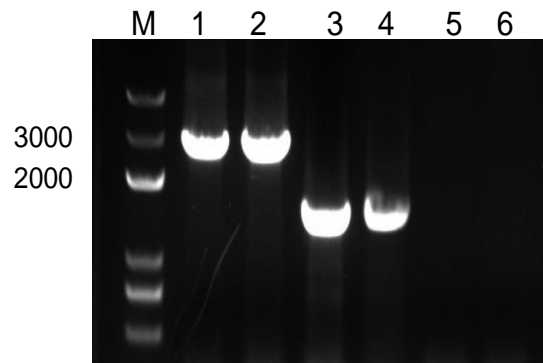

Supplementary Figure S3. PCR verification of overexpression of *ZMO0293* gene in ZM4.

Lane 1 represents wild -type ZM4; Lane 2 represents ZM4- $\Delta$ *ZMO0293*/pZM3*pdg*- *ZMO0293*.

Complement strain was constructed in ZM4- $\Delta$ *ZMO0293* with plasmid expression of *ZMO0293*.

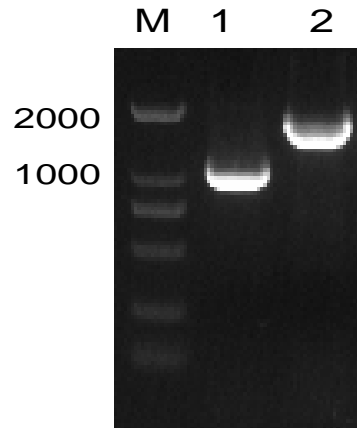

Supplementary Table S1. Primer used in this study

| Primers                                                                                 | Sequences (5'- 3')                                             |
|-----------------------------------------------------------------------------------------|----------------------------------------------------------------|
| <b>Genome modification for knockout of <i>ptsG</i> gene in <i>E. coli</i>:</b>          |                                                                |
| ptsGsg-F                                                                                | CGACATTCCGCGTTATATGGGTTTTAGAGCTAGAAATAGC                       |
| ptsGsg-R                                                                                | CCATATAACGCGGAATGTCTGACTAGTATTATACCTAGGAC                      |
| ptsGUP-F                                                                                | GGTAGGCGAACGTGACAACG                                           |
| ptsGUP-R                                                                                | AATTGAGAGTGCTCCTGAGTATGG                                       |
| ptsGDN-F                                                                                | AAGCACCCATACTCAGGAGCACTCTCAATTTCCGTAAGACGTT<br>GGGGAGAC        |
| ptsGDN-R                                                                                | CGCAGGACGATACCACACATATG                                        |
| ptsG-TF                                                                                 | AGTCGACTCACACTGCCATCTC                                         |
| ptsG-TR                                                                                 | CGGTTGGAACAGTGGCAAACG                                          |
| <b>Genome modification for integrating the <i>ZMO0293</i> gene in the neutral site:</b> |                                                                |
| ycgH-betA-sg-F                                                                          | CATCATGAATACTGGATATGGTTTTTAGAGCTAGAAATAGC                      |
| ycgH-betA-sg-R                                                                          | CATATCCAGTATTCATGATGACTAGTATTATACCTAGGAC                       |
| ykgH-UP-F                                                                               | AATCCCAGAGCCAGGCAAAT                                           |
| ykgH-UP-R                                                                               | ACCCGAACATTCCTGATACAG                                          |
| betA-DN-F                                                                               | CCTGCGTTAGTTCACATCACG                                          |
| betA-DN-R                                                                               | ACGGCCAACAAAGAAGTGCT                                           |
| gapAP1-F                                                                                | ATAGTCTGTATCAGGAATGTTTCGGGTGAGGCGAGTCAGTCGC<br>GTAATG          |
| gapAP1-R                                                                                | CCTCCTTTCCACCAGCTATTTGTTAGTGAATAAAAG                           |
| ZMOO293-F1                                                                              | AATAACAATTCAGAAATAGAAAATGATACCC                                |
| ZMOO293-R1                                                                              | GCGAAAAAACCCCGCCGAAGCGGGGTTTTTTGCGTTAGGCGG<br>AGGCTTTTTTACTC   |
| ZMOO293-F2                                                                              | CACTAACAATAGCTGGTGGAAAGGAGGAATAACAATTCAGA<br>AATAGAAAATGATACCC |
| ZMOO293-R2                                                                              | AAATGAGTCGTGATGTGAACTAACGCAGGGCGAAAAAACCCC<br>GCCGAAG          |

**Genome modification by knockout of *ZMO0293* gene in ZM4:**

|              |                                                                                       |
|--------------|---------------------------------------------------------------------------------------|
| ZMO0293sg-F  | GGCATTGAAATGATGATCTATTATACCCCGACGTTCACTGCCG<br>CACAGGCAGCTTAGAAAGGATCCTCGAACGCGCCGAAT |
| ZMO0293sg-R  | ATTCGGCGCGTTCGAGGATCCTTTCTAAGCTGCCTGTGCGGCA<br>GTGAACGTCGGGGTATAATAGATCATCATTTCAATGCC |
| mini-F       | GGATCCTCGAACGCGCCGAATAAGTAATTCAGGTTTTTTTATA                                           |
| mini-R       | AATAGATCATCATTTCAATGCCTTTCTAAGCTGCCTGTGCGGC<br>AGTGAACGGTACCAGA                       |
| ZMO0293UP-F  | TACCGGCTATATCAAGCTGCAAGTGTCGACCGAATAGCCCCTG<br>CATAGCG                                |
| ZMO0293UP-R  | ACCGGATTTTATAAAAAATAGATTATGCTGAACTAGAAATTTAT<br>CCCTTTTTTTTAGCG                       |
| ZMO0293DN-F  | TTCAGCATAATCTATTTTTTTATAAAATCCG                                                       |
| ZMO0293DN-R  | CAGTGTGACCTGCAGCGGCCGCTACTAGTAATCATCCGTTTGT<br>TCCGGTT                                |
| pMini-F      | TACTAGTAGCGGCCGCTGCAG                                                                 |
| pMini-R      | GTCGACACTTGCAGCTTGAT                                                                  |
| ZMO0293-DF   | TAAAGACCTGTTGCGGGAGG                                                                  |
| ZMO0293-DR   | TAGCGAGTCAGTGAGCGAGG                                                                  |
| ZMO0293-TF   | CCGCCCAAGGCATTGTACTG                                                                  |
| ZMO0293-TR   | AGCTTTCTACACGAGCTCTT                                                                  |
| pdcZMO0293-F | ACATAGTGTTTTGAATATATGGAGTAAGCAATGAATAACAATTC<br>AGAAATAGAAAATGATACC                   |
| pdcZMO0293-R | ATCGCCATGTAAGCCCACTGCAAGCTACCTTTAGGCGGAGGC<br>TTTTTTACTC                              |
| pdcZMO0366-F | ACATAGTGTTTTGAATATATGGAGTAAGCAATGAGTTCTGAAA<br>GTAGTCAGGGTCTAGTC                      |
| pdcZMO0366-R | ATCGCCATGTAAGCCCACTGCAAGCTACCTCTACTTCTGGGAG<br>CGCCACATCTCC                           |

|            |                                   |
|------------|-----------------------------------|
| pZM3pdc-F  | AGGTAGCTTGCAGTGGGCTT              |
| pZM3pdc-R  | TGCTTACTCCATATATTCAAAACACTATGTCTG |
| pZM3pdc-TF | GTTACGCTCATGATCGCGGC              |
| pZM3pdc-TR | ATCAGATCTTGATCCCCTGCG             |

---

Supplementary Table S2. The plasmid sequence used in this study.

| Name   | sequence                                                                                                                                                                                                                                                                                                                                                                                                                                                                                                                                                                                                                                                                                                                                                                                                                                                                                                                                                                                                                                                                                                                                                                                                                                                                                                                                                                                                                                                                                                                                                                                                                                                                                                                                                                                                                                                                                                                                                                                                                                                                                                                                                                                                                                                                                                                                                                                                                                                                                                                                                                                                                                                                 |
|--------|--------------------------------------------------------------------------------------------------------------------------------------------------------------------------------------------------------------------------------------------------------------------------------------------------------------------------------------------------------------------------------------------------------------------------------------------------------------------------------------------------------------------------------------------------------------------------------------------------------------------------------------------------------------------------------------------------------------------------------------------------------------------------------------------------------------------------------------------------------------------------------------------------------------------------------------------------------------------------------------------------------------------------------------------------------------------------------------------------------------------------------------------------------------------------------------------------------------------------------------------------------------------------------------------------------------------------------------------------------------------------------------------------------------------------------------------------------------------------------------------------------------------------------------------------------------------------------------------------------------------------------------------------------------------------------------------------------------------------------------------------------------------------------------------------------------------------------------------------------------------------------------------------------------------------------------------------------------------------------------------------------------------------------------------------------------------------------------------------------------------------------------------------------------------------------------------------------------------------------------------------------------------------------------------------------------------------------------------------------------------------------------------------------------------------------------------------------------------------------------------------------------------------------------------------------------------------------------------------------------------------------------------------------------------------|
| pMi ni | CGTTCACTGCCGCACAGGCAGCTTAGAAAAGGCATTGAAATGATGATCTATTATACCCCGAC<br>GTTCACTGCCGCACAGGCAGCTTAGAAAAGGATCCTCGAACGCGCCGAATAAGTAATTCAG<br>GTTTTTTTATAAAGACCTGTTGCGGGAGGTGGCCATGGGGGTCATCGTCAACCGCTTAACC<br>TGAAAAGGGTGATAAAATGGCAAAAAAATTACCGGCTATATCAAGCTGCAAGTGTTCGAC<br>TACTAGTAGCGGCCGCTGCAGGTCACACTGGCTCACCTTCGGGTGGGCCTTTCTGCGTTTA<br>TATACTAGAGAGAGAATATAAAAAGCCAGATTATTAATCCGGCTTTTTTATTATTGCGCTA<br>GCGGAGTGTATACTGGCTTACTATGTTGGCACTGATGAGGGTGTGAGTGAAGTGCTTCATG<br>TGGCAGGAGAAAAAAGGCTGCACCGGTGCGTCAGCAGAATATGTGATACAGGATATATTC<br>CGCTTCCTCGCTCACTGACTCGCTACGCTCGGTGCTTCGACTGCGGCGAGCGGAAATGGC<br>TTACGAACGGGGCGGAGATTTCTGGAAGATGCCAGGAAGATACTTAACAGGGGAAGTGA<br>GAGGGCCGCGGCAAAGCCGTTTTTCCATAGGCTCCGCCCCCTGACAAGCATCACGAAAT<br>CTGACGCTCAAATCAGTGGTGGCGAAACCCGACAGGACTATAAAGATAACAGGCGTTTCC<br>CCCTGGCGGCTCCCTCGTGCCTCTCCTGTTCTGCTTTCGGTTTACCGGTGTCATTCCG<br>CTGTTATGGCCGCGTTTGTCTCATTCCACGCCTGACACTCAGTTCCGGGTAGGCAGTTCGC<br>TCCAAGCTGGACTGTATGCACGAACCCCCGTTTCAAGTCCGACCGCTGCGCCTTATCCGGT<br>AACTATCGTCTTGAGTCCAACCCGGAAGACATGCAAAAGCACCCTGGCAGCAGCCAC<br>TGTAATTGATTTAGAGGAGTTAGTCTTGAAGTCATGCGCCGGTTAAGGCTAAACTGAAA<br>GGACAAGTTTTGGTGACTGCGCTCCTCCAAGCCAGTTACCTCGGTTCAAAGAGTTGGTAG<br>CTCAGAGAACCTTCGAAAAACCGCCCTGCAAGGCGGTTTTTTCGTTTTTTCAGAGCAAGAGA<br>TTACGCGCAGACCAAAACGATCTCAAGAAGATCATCTTATTAATCAGATAAAATATTTCTTG<br>ATTTCAAGTGAATTTATCTCTTCAAATGTAGCACCTGAAGTCAGCCCCATACGATATAAGTT<br>GTAAATTCTCATGTTTGACAGCTTATCATCGATGGAGCACAGGATGACGCCTAACAATTCA<br>TTCAAGCCGACACCGCTTCGCGGCGCGGCTTAATTCAGGAGTTAAACATCATGAGGGAAG<br>CGGTGATCGCCGAAGTATCGACTCAACTATCAGAGGTAGTTGGCGTCATCGAGCGCCATCT<br>CGAACCGACGTTGCTGGCCGTACATTTGTACGGCTCCGCAGTGGATGGCGGCCTGAAGCC<br>ACACAGTGATATTGATTGCTGGTTACGGTGACTGTAAGGCTTGATGAAACAACGCGGCG<br>AGCTTTGATCAACGACCTTTTGGAACTTCGGCTTCCCCTGGAGAGAGCGAGATTCTCCG<br>CGCTGTAGAAGTCACCATTGTTGTGCACGACGACATCATTCCGTGGCGTTATCCAGCTAAG<br>CGGAACTGCAATTTGGAGAATGGCAGCGCAATGACATTCTTGACAGGTATCTTCGAGCCA<br>GCCACGATCGACATTGATCTGGCTATCTTGCTGACAAAAGCAAGAGAACATAGCGTTGCC<br>TTGGTAGGTCCAGCGGCGGAGGAACCTTTTGATCCGGTTCCTGAACAGGATCTATTTGAG<br>GCGCTAAATGAAACCTTAACGCTATGGAACCTCGCCGCCCGACTGGGCTGGCGATGAGCGA<br>AATGTAGTGCTTACGTTGTCCCGCATTTGGTACAGCGCAGTAACCGGCAAAATCGCGCCG<br>AAGGATGTCGCTGCCGACTGGGCAATGGAGCGCCTGCCGGCCAGTATCAGCCCGTCATA<br>CTTGAAGCTAGGCAGGCTTATCTTGGACAAGAAGATCGCTTGGCCTCGCGCGCAGATCAG<br>TTGGAAGAATTTGTTCACTACGTGAAAGGCGAGATCACCAAGGTAGTCGGCAAATAATGT<br>CTAACAATTCGTTCAAGCCGACGCCGCTTCGCGGCGCGGCTTAAGTCAAGCGTTAGAGAG<br>CTGGGGAAGACTATGCGCGATCTGTTGAAGGTGGTTCTAAGCCTCGTACTTGCGATGGCAT<br>CGGGGCAGGCACTTGCTGACCTGCCAAGCAATTCGCTAGTGAGTACTGAATTTATTCTGAT<br>TCGTCTTGCTTTTGGAGCGTCTTTTTGCGTCTCTATAACTGTTGTGAAAGCTACGCGGTTCG |



|                                                                             |                                                                                                                                                                                                                                                                                                                                                                                                                                                                                                                                                                                                                                                                                                                                                                                                                                                                                                                                                                                                                                                                                                                                                                                                                                                                                                                                                                                                                                                                                                                                                                                                                                                                                                                                                                                                                                                        |
|-----------------------------------------------------------------------------|--------------------------------------------------------------------------------------------------------------------------------------------------------------------------------------------------------------------------------------------------------------------------------------------------------------------------------------------------------------------------------------------------------------------------------------------------------------------------------------------------------------------------------------------------------------------------------------------------------------------------------------------------------------------------------------------------------------------------------------------------------------------------------------------------------------------------------------------------------------------------------------------------------------------------------------------------------------------------------------------------------------------------------------------------------------------------------------------------------------------------------------------------------------------------------------------------------------------------------------------------------------------------------------------------------------------------------------------------------------------------------------------------------------------------------------------------------------------------------------------------------------------------------------------------------------------------------------------------------------------------------------------------------------------------------------------------------------------------------------------------------------------------------------------------------------------------------------------------------|
|                                                                             | <p> CATTGAAAACGAAATTAGGATTAATAAAAATACCATCCTTGGCGAACATGCTTTGCAATGAT<br/> TTTAGCTTTTTCTAATTCGGCTAGACCTCTTGCAAAGGTAGCTTGAGATAGTGCCAGTTTTT<br/> TTTCTTGTCGTTAAGAAAGTCCTCTAAAACGAATTTGTCTAAAGGGACGAGGTCTTTGCT<br/> GATGCCTTTGTCTTGAAGTATCCAAACCAGAACGCTGAAAGCTTTTATTCCAGCGGCTCCT<br/> AGTTCAAAAGTTAGCGCGATATTGGTGCTAAATAATTTTACAAATTCTTCACTATCAACACG<br/> TCTGTAAAGTCGTACATGAGTGCCTTGCATCTCACCAGTGGCTTGATTGACCAGAATGTTA<br/> TCATCTCGTCCTAATCGAGATAACTGAACCCTCTGACTTTTAACTGGCACAACCATACTT<br/> CGATGAAAGGATTCTCGTCATATCTGATTGGCTGCTTTCTCAATTTTGTGCGCCATATTTGATA<br/> AACCTTTAATCAAAAAAACCACATTTTTTTGATTATACCTATTCATCGAATGAGGCAAGGTCT<br/> ATCAATTTTACCCCTTTTTTTTGATAGACGGTTTAATCAATATTGATAGACCCCTTCACAGATT<br/> CTGAAAATCGACTTCCCTATTTTAGGGATATTTTACGATTCCCTTTCTTAGTTCTTCCTAGT<br/> GGGGAAATTCGTTGAATCCTGCCTCGGAAAAACCATGAGAAAGCTGTTGGTTATATACAC<br/> GGGCAAAGCCACCCTATTTTTAGCTACTGGGGAAAGAGATAAGGCAGGTCACCAGCTCAC<br/> CGTCTGAATTCGCGGCCGCTTCTAGAATTTACGATTGCTCGTCCTAAATAAATAAGAGTCTT<br/> AAATATTTGTTTTAAAAATGTAATTTCAAAAATTCTCGTGATAAATTTATATGCCATAAATAT<br/> AGAAAATGCAGATTTTATTTAGTATTTATAAAAATATTTTAAATGTACAACAGTCTACATTCTA<br/> ATAATAAAATTAGCCATTGTAGATACAGAAGATTTTCTGGTAC </p>                                                                                                                                                                                                                                                                                                                                                                                                                                                                                                                                                                                                                                                                     |
| <p> <b>p</b><br/> <b>Z</b><br/> <b>M</b><br/> <b>3p</b><br/> <b>dc</b> </p> | <p> AGGTAGCTTGCAGTGGGCTTACATGGCGATAGCTAGACTGGGCGGTTTTATGGACAGCAA<br/> GCGAACCGGAATTGCCAGCTGGGGCGCCCTCTGGTAAGGTTGGGAAGCCCTGCAAAGTA<br/> AACTGGATGGCTTTCTTGCCGCCAAGGATCTGATGGCGCAGGGGATCAAGATCTGATCAA<br/> GAGACAGGATGAGGATCGTTTTCGCATGATTGAACAAGATGGATTGCACGCAGGTTCTCCG<br/> GCCGCTTGGGTGGAGAGGCTATTCGGCTATGACTGGGCACAACAGACAATCGGCTGCTCT<br/> GATGCCCGCGTGTTCCGGCTGTGACGCGAGGGGCGCCCGGTTCTTTTTGTCAAGACCGAC<br/> CTGTCCGGTGCCCTGAATGAACTGCAGGACGAGGCAGCGCGGCTATCGTGGCTGGCCAC<br/> GACGGGCGTTCTTGCGCAGCTGTGCTCGACGTTGTCACTGAAGCGGGAAGGGACTGGC<br/> TGCTATTGGGCGAAGTGCCGGGGCAGGATCTCCTGTATCTCACCTTGCTCCTGCCGAGA<br/> AAGTATCCATCATGGCTGATGCAATGCGGCGGCTGCATACGCTTGATCCGGCTACCTGCCC<br/> ATTGACCACCAAGCGAAACATCGCATCGAGCGAGCACGTACTCGGATGGAAGCCGGTCT<br/> TGTCGATCAGGATGATCTGGACGAAGAGCATCAGGGGCTCGCGCCAGCCGAAGTTTCGC<br/> CAGGCTCAAGGCGCGCATGCCCCACGGCGAGGATCTCGTCGTGACCCATGGCGATGCCTG<br/> CTTGCCGAATATCATGGTGGAATGGCCGCTTTTCTGGATTTCATCGACTGTGGCCGGCTG<br/> GGTGTGGCGGACCGCTATCAGGACATAGCGTTGGCTACCCGTGATATTGCTGAAGAGCTT<br/> GGCGGCGAATGGGCTGACCGCTTCCTCGTGCTTTACGGTATCGCCGCTCCCGATTTCGAG<br/> CGCATCGCTTCTATCGCCTTCTTGACGAGTTCTTCTGAGCGGGACTCTGGGGTTCGAAAT<br/> GACCGACCAAGCGACGCCAACCTGCCATCACGAGATTTTCGATTCCACCGCCGCCTTCTA<br/> TGAAAGGTTGGGCTTCGGAATCGAGGATCTAGGTGAAGATCCTTTTTTGATAATCTCATGAC<br/> CAAAATCCCTTAACGTGAGTTTTCTGTTCCACTGAGCGTCAGACCCCGTAGAAAAGATCAA<br/> AGGATCTTCTTGAGATCCTTTTTTCTGCGCGTAATCTGCTGCTTGCAAACAAAAAACC<br/> CCGCTACCAGCGGTGGTTTGTGTTGCCGGATCAAGAGCTACCAACTCTTTTTCCGAAGGTA<br/> ACTGGCTTCAGCAGAGCGCAGATACCAATACTGTCCTTCTAGTGTAGCCGTAGTTAGGCC<br/> ACCACTTCAAGAACTCTGTAGCACCGCCTACATACCTCGCTCTGCTAATCCTGTTACCAGT<br/> GGCTGCTGCCAGTGGCGATAAGTCGTGTCTTACCGGGTTGGACTCAAGACGATAGTTACC<br/> GGATAAGGCGCAGCGGTCTGGGCTGAACGGGGGGTTCTGTCACACAGCCCAGCTTGGAGC<br/> GAACGACCTACACCGAACTGAGATACCTACAGCGTGAGCATTGAGAAAGCGCCACGCTT </p> |

|                                                                                                                                                                                                                                                                                                                                                                                                                                                                                                                                                                                                                                                                                                                                                                                                                                                                                                                                                                                                                                                                                                                                                                                                                                                                                                                                                                                                                                                                                                                                                                                                                                                                                                                                                                                                                                                                                                                                                                                                                                                                                                                                                                                                                                                                                                                                                                                                                                                                                                                                                                                                                                                                                                                                                                                                                                                                                                                                                                                                                                                  |
|--------------------------------------------------------------------------------------------------------------------------------------------------------------------------------------------------------------------------------------------------------------------------------------------------------------------------------------------------------------------------------------------------------------------------------------------------------------------------------------------------------------------------------------------------------------------------------------------------------------------------------------------------------------------------------------------------------------------------------------------------------------------------------------------------------------------------------------------------------------------------------------------------------------------------------------------------------------------------------------------------------------------------------------------------------------------------------------------------------------------------------------------------------------------------------------------------------------------------------------------------------------------------------------------------------------------------------------------------------------------------------------------------------------------------------------------------------------------------------------------------------------------------------------------------------------------------------------------------------------------------------------------------------------------------------------------------------------------------------------------------------------------------------------------------------------------------------------------------------------------------------------------------------------------------------------------------------------------------------------------------------------------------------------------------------------------------------------------------------------------------------------------------------------------------------------------------------------------------------------------------------------------------------------------------------------------------------------------------------------------------------------------------------------------------------------------------------------------------------------------------------------------------------------------------------------------------------------------------------------------------------------------------------------------------------------------------------------------------------------------------------------------------------------------------------------------------------------------------------------------------------------------------------------------------------------------------------------------------------------------------------------------------------------------------|
| <p> CCCGAAGGGAGAAAGGCGGACAGGTATCCGGTAAGCGGCAGGGTCGGAACAGGAGAGC<br/> GCACGAGGGAGCTTCCAGGGGGAAACGCCTGGTATCTTTATAGTCCTGTCTGGGTTTCGCC<br/> ACCTCTGACTTGAGCGTCGATTTTTGTGATGCTCGTCAGGGGGGCGGAGCCTATGGAAAA<br/> ACGCCAGCAACGCGGCCCTTTTACGGTTCCTGGCCTTTTGCTGGCCTTTTGCTCACATGTT<br/> CTTTCCTGCGTTATCCCCTGATTCTGTGGATAACCGTATTACCGCCTTTGAGTGAGCTGATA<br/> CCGCTCGCCGAGCCGAACGACCGAGCGCAGCGAGTCAGTGAGCGAGGAAGCGGAAGA<br/> GCGCCCAATACGCAAACCGCCTCTCCCCGCGCGTTGGCCGATTCATTAATGCAGCTGGCA<br/> CGACAGGTTTCCCGGAAAGGTCATCCTGAAAATTCTATTCTGATTCTGATCAACCAGATCG<br/> TGAATGATCGGGCGATGAGCCGGAAGCTTGTCCCGTGATCAGAACC GGCGCAGCCTCTTC<br/> CCTTTTATCTATTTCAAATTCAGGCCTGCCACAGCGGAGAATCTTCGCTGTGGCTTTTTTG<br/> GTCCAAGACCGGAGCCCGCACAAATGACCGCCTCTTCCTCTTCAGCGCCCCCTCTCGGATGC<br/> CTCTGTCTTTTCTTTAGAGCCTGTCTCTGCGTCTTTTGAACAAACGACGCCCCGTAACCAGT<br/> CCTTTTATCGACAGGCTAGGCCGTTTCAAGCGTGCCACTTATCGAACCATGTTGGTTGAAA<br/> CGGGTATGCCATATGACAGCGCAAAGATTATGGCAGATCAGGCCGCGAGAACACATAAAA<br/> GAGAGCGCACATTCTCTAAATTAATGCCCTTGGCCAATGGCGCTCATCCCGAAATTCGGC<br/> CTCAAATACCAATATTGAGGCTACAGCCTCTGCATCAGATTCGACGAAATCGAATATTTTG<br/> ACCAGATGGTATCAAACGGCGTTGATCCTAGAGATGCCGCGAGATATTGCTCGCAAAACAG<br/> CTATTGCGGAGACGTCGAGACCCTCTCGAACGAGCCATTTCGCTATAAAACCCGCCGTCAA<br/> CTCCTGATCCTGTGCATCGGGATTCTTATGAGGTGGGCGAACGCGAGAAGTCGGTCTGGA<br/> AGCCGGTCAATCCGCAAGAGATTGGTGCCTATCTGGAAGCGGTTGATCAATATTCGATCAA<br/> AACCAAGGGCTTAAGCGATAAGGCCGTTTCGTCTTCTAAAGATGCTGTTTCGGATGGTCGA<br/> CTTTAAACTGGCCGTCTGGAGCCGACCCTCGACACAATATGCGATCGTGTCTGGTTATGCC<br/> CGTGCGACGGTCGTCAAATTACTGCGGCAATTACAGGATTTAGGCTTCATCCGCTGGATAC<br/> GCCGGTCAATCAAGATCAAGGCGGACGGCAAAGGCCCCCGCCGCAAGCAGACCAGTAAC<br/> GCCTACGGCTTCTTGTCTCCCAAGGCTTGGCCAGATTTGGCCAGACAGGTTTTCGAGCGT<br/> GTGATGCGCCGGAGGCATGCGCCTATTCTGACGATATCGACCACGCCCAAGAGGCGGAC<br/> AAAGCCGAAACCAAGGCTATCGTTGAAAGCTTGCCGCCCGAAGATTCGTCAAAGCAATA<br/> TCGGGCGATAAAGAGCCAACAGAGTTAACAGATTTCGTTAATACAGCTCGCCAAATCTATC<br/> GAGCGGGCGGAACAACGGGAACAAGAAGAACAGGCTAAGAAGGCAGCACAGGCCGGT<br/> CAGGAAGAGGTTAAACATCTTCCCAAACACCTAAGGAGGATACCTCAAAAAAGCCCCC<br/> AATCTCGGGCAATCAACGCGAGTTCAATTCTTATACTCTATCCTGTTATACTTATTTATCTAA<br/> TAGCGACCATAAAAACTAAAAACCAAGAAGAAGATAAAGACTGCACTGCTCCTGCTA<br/> CCGCAGGCAGTGACAGACCCTATTTATGATCGAAAACCTGACAGCAATCCTTTCTCTCAAC<br/> TCTCAAAGCTCGCGGTTATCGTCCTGATCAAATCAACGCTTGCCCTCGAAAACAGAGATAA<br/> ACGGAAAAAGAAAGGATGGATGCCTCTGTACCCGATGAAACCGCCCGCCTCCTTATTCA<br/> AACAAAACAGATGTGCCATAACAACGACCACTATCCTTCTCAAAGCATATCGTCCGTTAA<br/> TCTCTCGGCGCTGCTCGCTTCGCTCACAGGCTCGGCGAGAAAGAAATTTGCCTTTTCGGGG<br/> GACTATCTAATTCCTAACAATTTCGCATTATCGATAATGTAATAAAAGGCTAATCTTTAAAAA<br/> CCAAATTACAGCGATTACATCATTTCTATGAATGTGTATTATACATAATATGAGAAGTCGTGA<br/> TTTGATCAAAGAAGTTAAAAAAGCCAATATTACCAGCTTGACAGATATAAAATAGGCCTTG<br/> GTTGATTTTCGTGAAAGAACTGGAAGATTGCACAATTCTTCTTTCTGGTGATATCTTTGACC<br/> CGACGGCCCTCAGTCAATGAGTGTGCGCCGCATTTCTGCCCATTCAATCAGGGCCTGCATT<br/> GAAGGGCCGAGAGCGTATCCCATACCGCTGAGCTCGTATTCTACCTTTGGCGGGACCTGC<br/> GGATAGACCGTTTCGGAGCACGATGCGATCCTTTTCCAGTTGCTTGAGCTGCTGGATCAGCA </p> |
|--------------------------------------------------------------------------------------------------------------------------------------------------------------------------------------------------------------------------------------------------------------------------------------------------------------------------------------------------------------------------------------------------------------------------------------------------------------------------------------------------------------------------------------------------------------------------------------------------------------------------------------------------------------------------------------------------------------------------------------------------------------------------------------------------------------------------------------------------------------------------------------------------------------------------------------------------------------------------------------------------------------------------------------------------------------------------------------------------------------------------------------------------------------------------------------------------------------------------------------------------------------------------------------------------------------------------------------------------------------------------------------------------------------------------------------------------------------------------------------------------------------------------------------------------------------------------------------------------------------------------------------------------------------------------------------------------------------------------------------------------------------------------------------------------------------------------------------------------------------------------------------------------------------------------------------------------------------------------------------------------------------------------------------------------------------------------------------------------------------------------------------------------------------------------------------------------------------------------------------------------------------------------------------------------------------------------------------------------------------------------------------------------------------------------------------------------------------------------------------------------------------------------------------------------------------------------------------------------------------------------------------------------------------------------------------------------------------------------------------------------------------------------------------------------------------------------------------------------------------------------------------------------------------------------------------------------------------------------------------------------------------------------------------------------|

|                                                                                                                                                                                                                                                                                                                                                                                                                                                                                                                                                                                                                                                                                                                                                                                                                                                                                                                                                                                                                                                                                                                                                                                                              |
|--------------------------------------------------------------------------------------------------------------------------------------------------------------------------------------------------------------------------------------------------------------------------------------------------------------------------------------------------------------------------------------------------------------------------------------------------------------------------------------------------------------------------------------------------------------------------------------------------------------------------------------------------------------------------------------------------------------------------------------------------------------------------------------------------------------------------------------------------------------------------------------------------------------------------------------------------------------------------------------------------------------------------------------------------------------------------------------------------------------------------------------------------------------------------------------------------------------|
| <p> TCTTCTGGTTGATGCCGTCGATCTGCTTTTCCAGTGAGGAGAAGCGGATTGGGCCTTTTGC<br/> GGCAAACAACCTGGCAGATGATAACAATCTTCCATTTTCCTTCGAGTACCCTGAGCGCTTCT<br/> GTCGTCGCCTCAGTTACGCTCATGATCGCGGCATGTTCTGATATTTTTCCTCTAAAAAAGAT<br/> AAAAAGTCTTTTCGCTTCGGCAGAAGAGGTTTCATCATGAACAAAAATTTCGGCATTTTTAA<br/> AAATGCCTATAGCTAAATCCGGAACGACACTTTAGAGGTTTCTGGGTCATCCTGATTCAGA<br/> CATAGTGTTTTGAATATATGGAGTAAGCAATGAGCAAAGGAGAAGAAGCTTTTCACTGGAG<br/> TTGTCCCAATTCTTGTTGAATTAGATGGTGATGTTAATGGGCACAAATTTTCTGTCAGTGG<br/> AGAGGGTGAAGGTGATGCTACATACGGAAACTCACCCCTTAAATTTATTTGCACTACTGGA<br/> AAACTACCTGTTCCATGGCCAACACTTGTCACTACTCTGACCTATGGTGTTCAATGCTTTT<br/> CCCGTTATCCGGATCACATGAAACGGCATGACTTTTTCAAGAGTGCCATGCCCCGAAGGTTA<br/> TGTACAGGAACGCACTATATCTTTCAAAGATGACGGGAACTACAAGACGCGTGCTGAAGT<br/> CAAGTTTGAAGGTGATACCCTTGTTAATCGTATCGAGTTAAAGGGTATTGATTTTAAAGAA<br/> GATGGAAACATTCTCGGACACAACTAGAGTACAACCTATAACTCACACAATGTATACATCA<br/> CGGCAGACAAACAAAAGAATGGAATCAAAGCTAACTTCAAAAATTTCGCCACAACATTGAA<br/> GATGGTTCCGTTCAACTAGCAGACCATTATCAACAAAATACTCCAATTGGCGATGGCCCTG<br/> TCCTTTTACCAGACAACCATTACCTGTGACACAATCTGCCCTTTCGAAAGATCCCAACGA<br/> AAAGCGTGACCACATGGTCCTTCTTGAGTTTGTAAGTCTGCTGGGATTACACATGGCATG<br/> GATGAGCTCTACAAA </p> |
|--------------------------------------------------------------------------------------------------------------------------------------------------------------------------------------------------------------------------------------------------------------------------------------------------------------------------------------------------------------------------------------------------------------------------------------------------------------------------------------------------------------------------------------------------------------------------------------------------------------------------------------------------------------------------------------------------------------------------------------------------------------------------------------------------------------------------------------------------------------------------------------------------------------------------------------------------------------------------------------------------------------------------------------------------------------------------------------------------------------------------------------------------------------------------------------------------------------|

Supplementary Table S3. Primer sequence for qPCR of the main genes involved in ED pathway

| Primers    | Sequences (5'- 3')      |
|------------|-------------------------|
| 16sRNA-F   | TCACCGCCATTGTAGCAC      |
| 16sRNA-R   | AGTTGGGCACTTTAGAGGAAC   |
| ZMO0293-F  | AAGCATTCAGACCGCCATA     |
| ZMO0293-R  | TGCGGGTGGTATTCAGGTTA    |
| ZMO0366-F  | GGTTGGTGATGAAGGGACGT    |
| ZMO0366-R  | TTTGTAAGCCGAACCACCG     |
| ZMO0152-F  | CAGACCAAACCAAGACGACG    |
| ZMO0152-R  | CTGAAAACGCCAGCAAAACC    |
| ZMO0177-F  | ATGACCTGGGTAGCGTTGAA    |
| ZMO0177-R  | TCACGATATCAACGCCAAGC    |
| ZMO0178-F  | ATTTTGGCTCACTTCGGTCG    |
| ZMO0178-R  | TGATGAAGTGAACCGGACGA    |
| ZMO0367-F  | TGGTTTCCGTGATTTTGCAGA   |
| ZMO0367-R  | AGGTCAGCTAATTTTCCGAATTG |
| ZMO0368-F  | CCGTCCAAACCTGTCCTGTA    |
| ZMO0368-R  | GCGAGCAAATACTTTCATCTGC  |
| ZMO0369-F  | CGACTTTTAAAACGGCAGAACA  |
| ZMO0369-R  | CGTATCGATGTCCAGCTTTTCA  |
| ZMO0487-F  | AGACAAAGAGCAAGCCAGAG    |
| ZMO0487-R  | AAGAAGTCAAAGCAGCACCG    |
| ZMO0569-F  | GACCCCTATAATGCGGCTGA    |
| ZMO0569-R  | CCAGTCCAGAAAATTATGCGC   |
| ZMO0997-F  | TGGTGGTCTGAACGTTCTTG    |
| ZMO0997-R  | GTCAGACCCGGGCTAACGAA    |
| ZMO01236-F | CGATACCGTCAAGCACCAAG    |
| ZMO01236-R | CGGTGGTGACAGCTGTTGCC    |

|           |                        |
|-----------|------------------------|
| ZMO1237-F | GCAAAGACGCTCCCGATATG   |
| ZMO1237-R | GAATCGGCAAATTTACGCG    |
| ZMO1240-F | CTTGCCAGCCTTCAGTTCAG   |
| ZMO1240-R | CAAGTTCGATCTGTCTGGCG   |
| ZMO1360-F | TCTTGATGTTGTTGTACGGACC |
| ZMO1360-R | TCAGGAAGTCGCTCAGATGG   |
| ZMO1478-F | GACAAGCTAAGGGTTACGCG   |
| ZMO1478-R | TTCCCAGGTCCCAATTTCTGA  |
| ZMO1496-F | CGGGGTATTGTTGACAGCAC   |
| ZMO1496-R | TCAGGATCAAGGGCATCTCC   |
| ZMO1570-R | CGATTTGAAAGGCCCCGTTG   |
| ZMO1570-F | GCCCCTGCCCCGAAATAACC   |
| ZMO1596-F | AATCCGGTGTTGTGAAGCAG   |
| ZMO1596-R | CACCGAGGGAGATGACGAAG   |
| ZMO1608-F | GGCTACCGGTCTTGATCTGA   |
| ZMO1608-R | GCTGCTCGTGAAGTTTAACCA  |
| ZMO1719-F | CCACAACCCCTGAAGAAACG   |
| ZMO1719-R | GTTTCGGGGTGTTGGTGATA   |
| ZMO1722-F | AAGCAGAGCCTTTCCAAACG   |
| ZMO1722-R | CTTGGAAGCCTGTCATCGTG   |
| ZMO1754-F | ACCGCATAAATCTGGGCAAT   |
| ZMO1754-R | CGGTTCAAAATGGCGCAAAG   |
| ZMO1955-F | CCTTTATTCTGTGCTGCTGGT  |
| ZMO1955-R | ACGCCTATATTTTCCCGGGT   |
| ZMO1963-F | GCGGTAAACATAGAAGTCGGG  |
| ZMO1963-R | CTCGCGCCTTGGAAGAAATC   |

---
